# Supplementary material for: How the spontaneous insertion of amphiphilic imidazolium-based cations changes biological membranes: a molecular simulation study
Source: Royal Society of Chemistry journal article supplement (doi:10.1039/c5cp04806k), 2015-01-01
Supplement: c5cp04806k1.pdf [file c5cp04806k1.pdf]

# How the Spontaneous Insertion of Amphiphilic Imidazolium-Based Cations Change Biological Membranes: A Molecular Simulation Study

Geraldine S. Lim<sup>a</sup>, Stephan Jaenicke<sup>b</sup> and Marco Klähn<sup>c\*</sup>

<sup>a</sup> Institute of High Performance Computing, Agency for Science, Technology and Research, 1 Fusionopolis Way, #16-16, Connexis, Singapore 138632, Rep. of Singapore

<sup>b</sup> National University of Singapore, Department of Chemistry, 3 Science Drive 3, Singapore 117543, Rep. of Singapore

<sup>c</sup> Institute of Chemical and Engineering Sciences, Agency for Science, Technology and Research, 1 Pesek Road, Jurong Island, Singapore 627833, Rep. of Singapore

E-mail: [klahnm@ices.a-star.edu.sg](mailto:klahnm@ices.a-star.edu.sg)

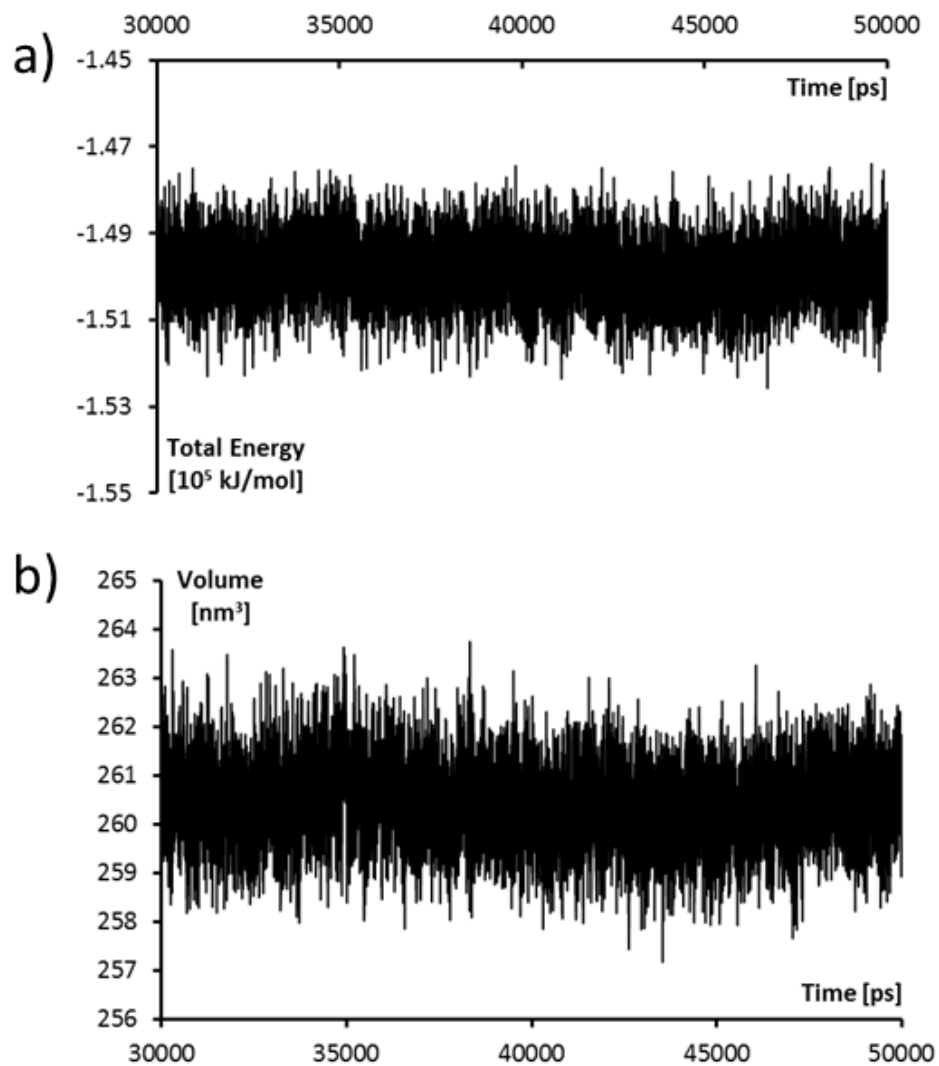

**Figure S1:** Total energy (a) and volume (b) of solvated membrane system over the last 20 ns of equilibration simulation. Results were subsequently used to initiate free energy calculations.

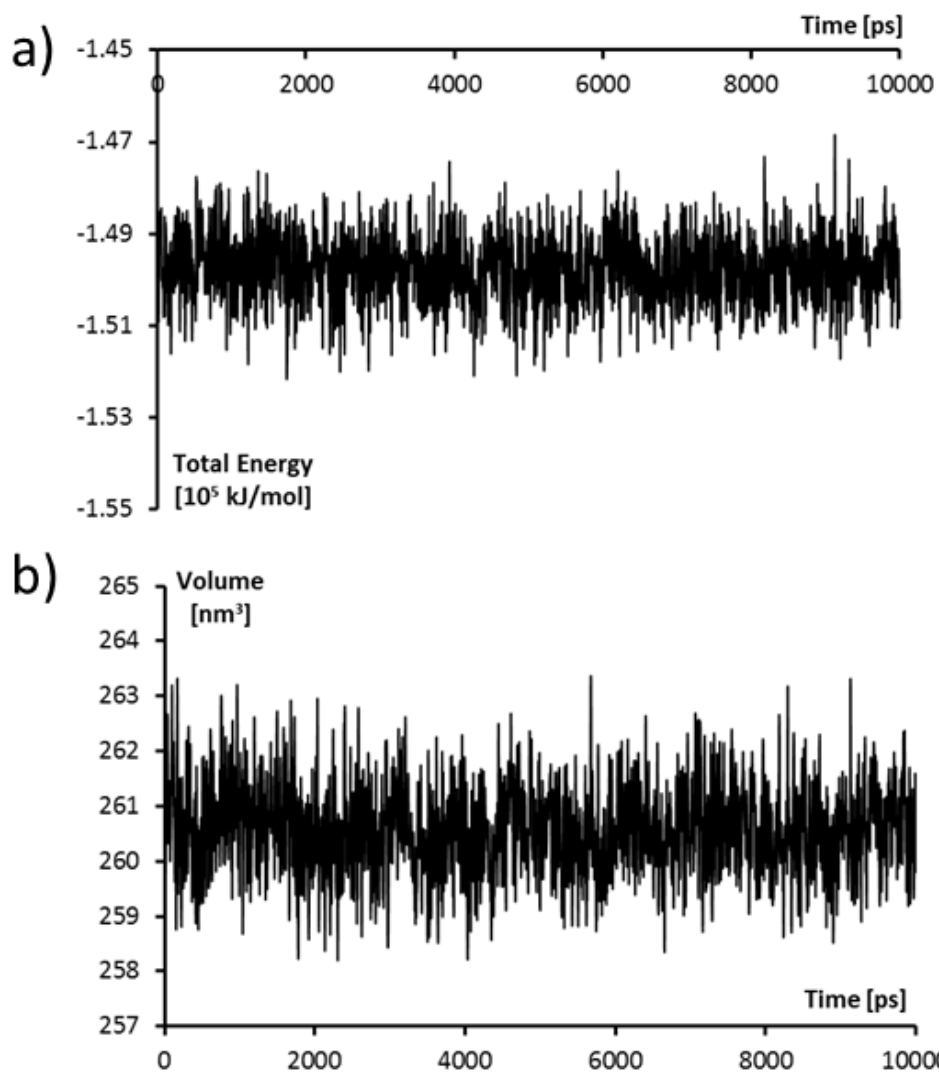

**Figure S2:** A representative plot of the total energy (a) and volume (b) as a function of simulation time. This was recorded during an MD run, which was used to derive free energy changes that were induced by pulling OMIM<sup>+</sup> from water into the membrane.

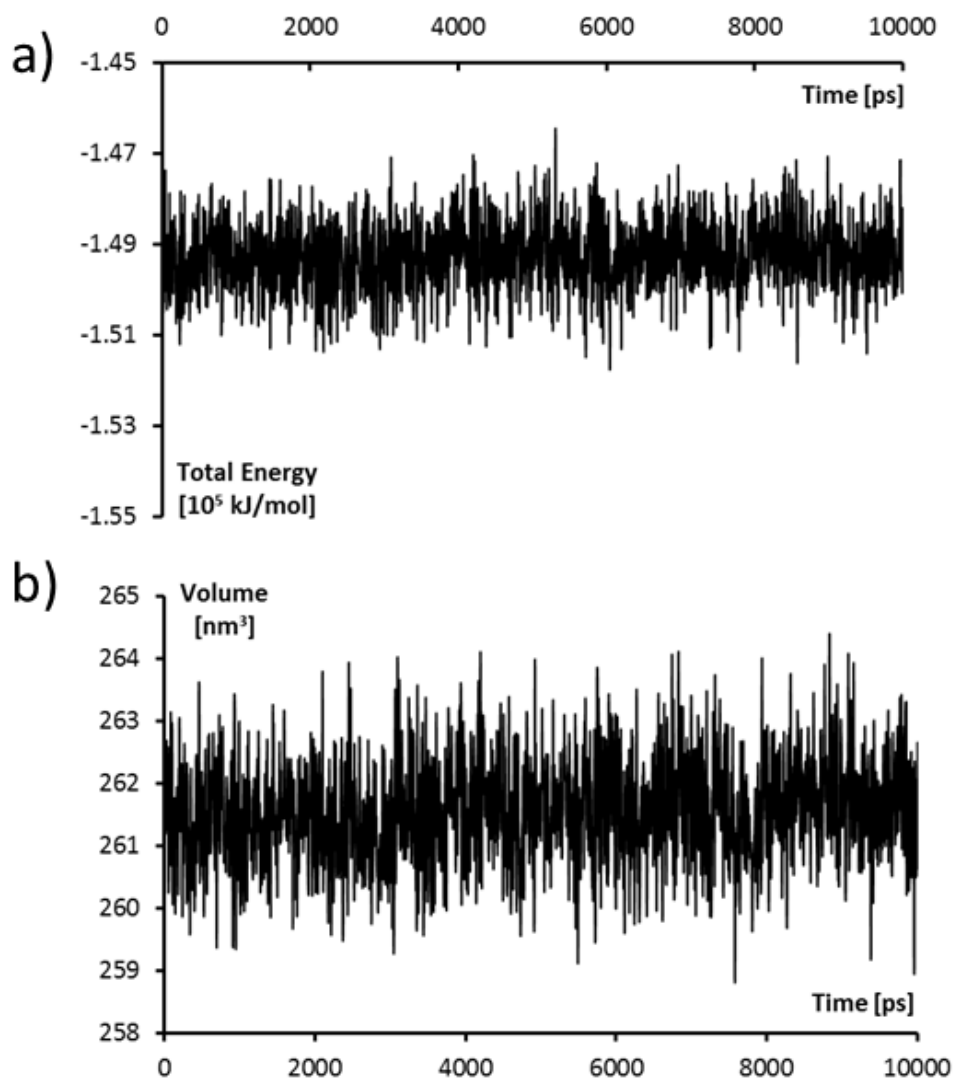

**Figure S3:** A representative plot of the total energy (a) and volume (b) as a function of simulation time. This was recorded during an MD run, which was used to derive free energy changes that were induced by pulling OMIM<sup>+</sup> from the membrane into water, while a second cation remained inside the membrane. At the start of these simulations, the two cations were placed inside the membrane *closer* than their energetically optimum distance.

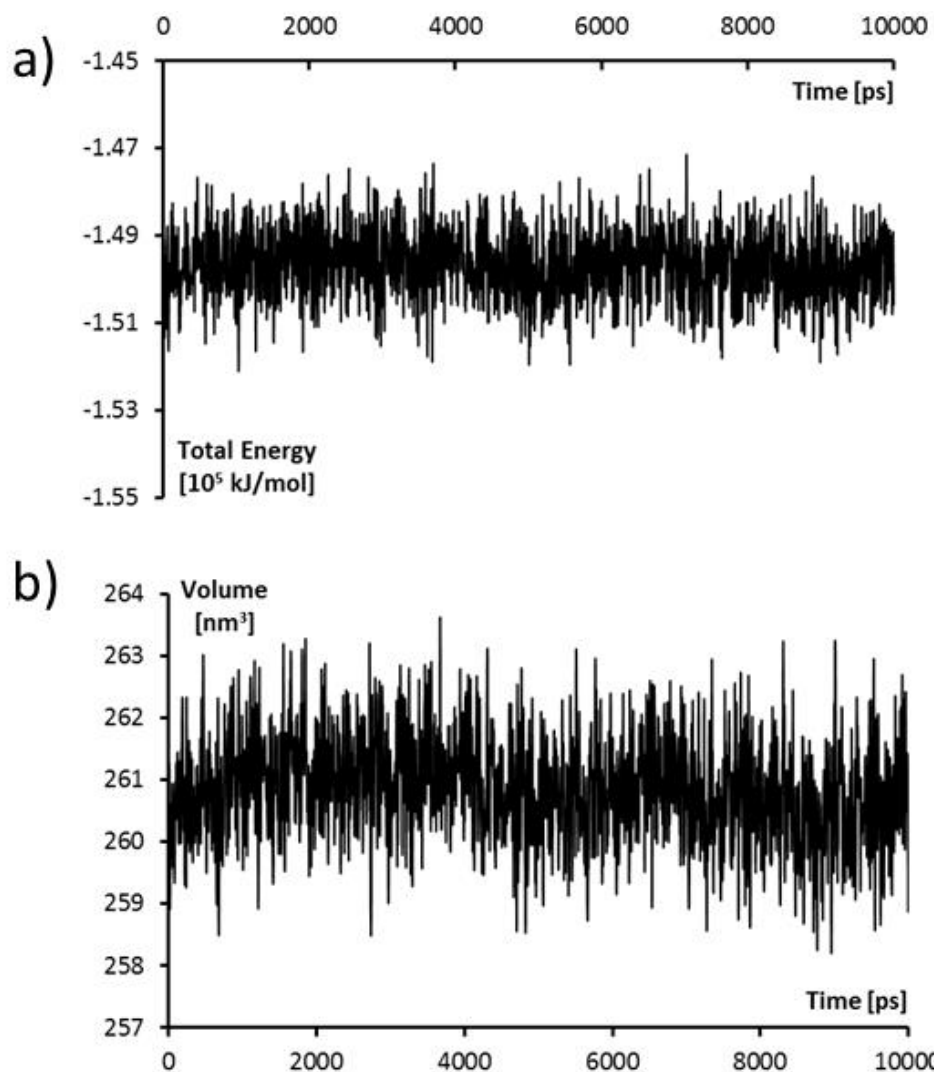

**Figure S4:** A representative plot of the total energy (a) and volume (b) as a function of simulation time. This was recorded during an MD run, which was used to derive free energy changes that were induced by pulling OMIM<sup>+</sup> from the membrane into water, while a second cation remained inside the membrane. At the start of these simulations, the two cations were placed inside the membrane *at* their energetically optimum distance.

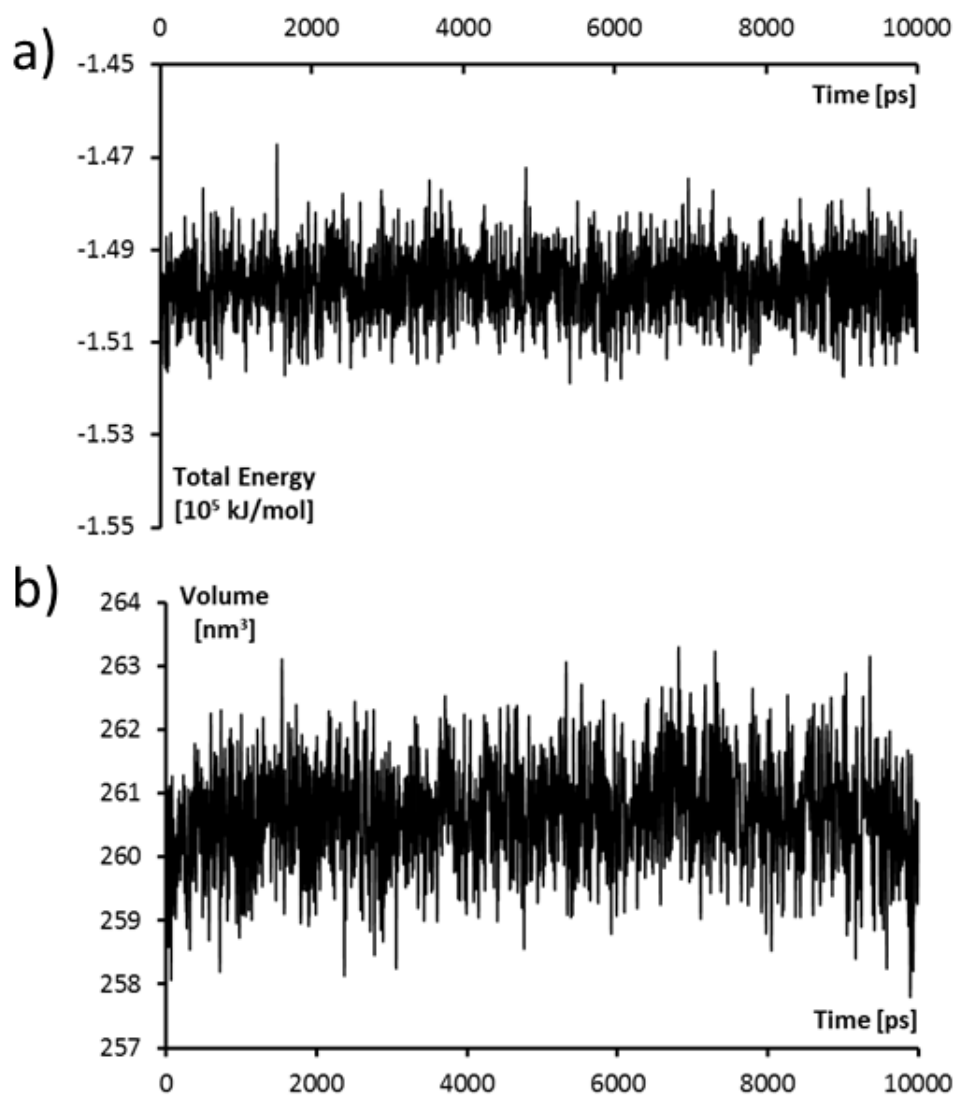

**Figure S5:** A representative plot of the total energy (a) and volume (b) as a function of simulation time. This was recorded during an MD run, which was used to derive free energy changes that were induced by pulling OMIM<sup>+</sup> from the membrane into water, while a second cation remained inside the membrane. At the start of these simulations, the two cations were placed inside the membrane *farther* than their energetically optimum distance.

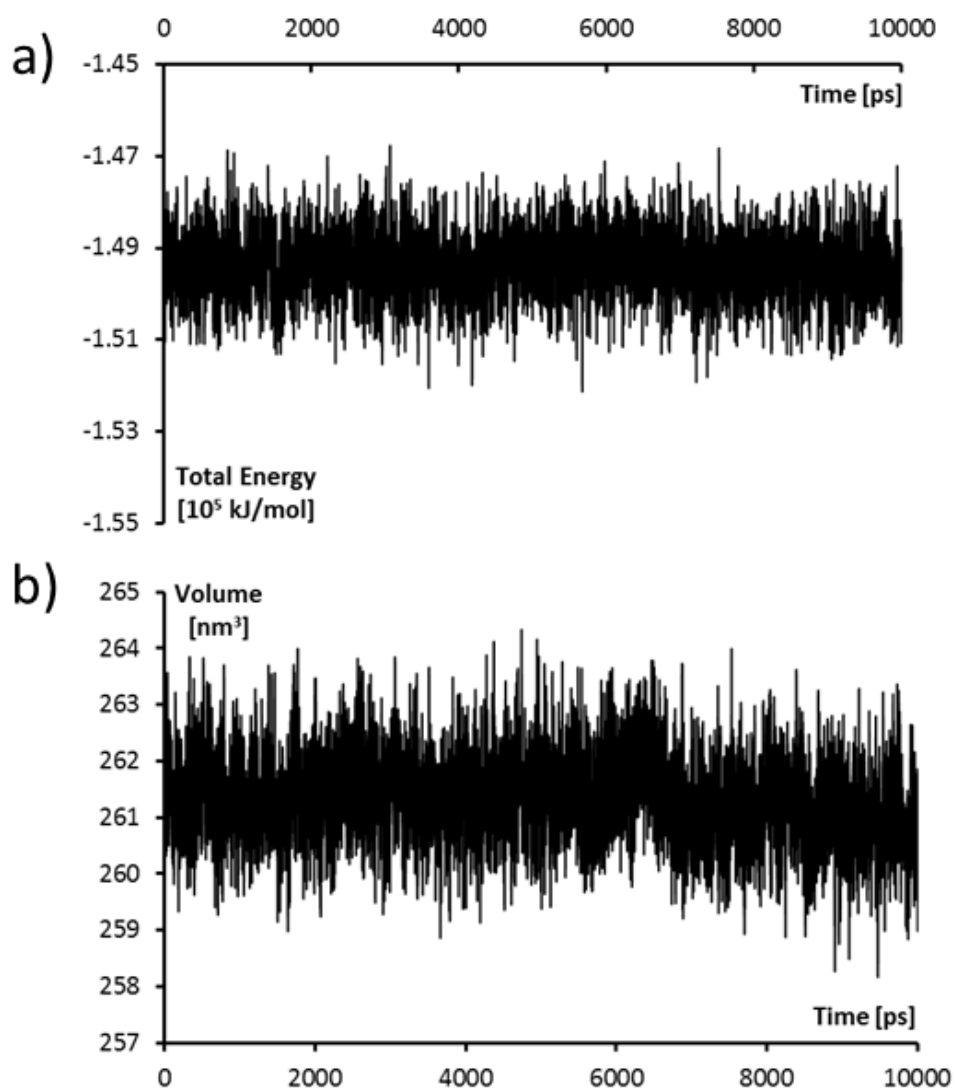

**Figure S6:** A representative plot of the total energy (a) and volume (b) as a function of simulation time. This was recorded during an MD run, which was used to derive free energy changes that were induced by pulling  $\text{OMIM}^+$  across the membrane relative to a second cation, while both cations remained inside the membrane.

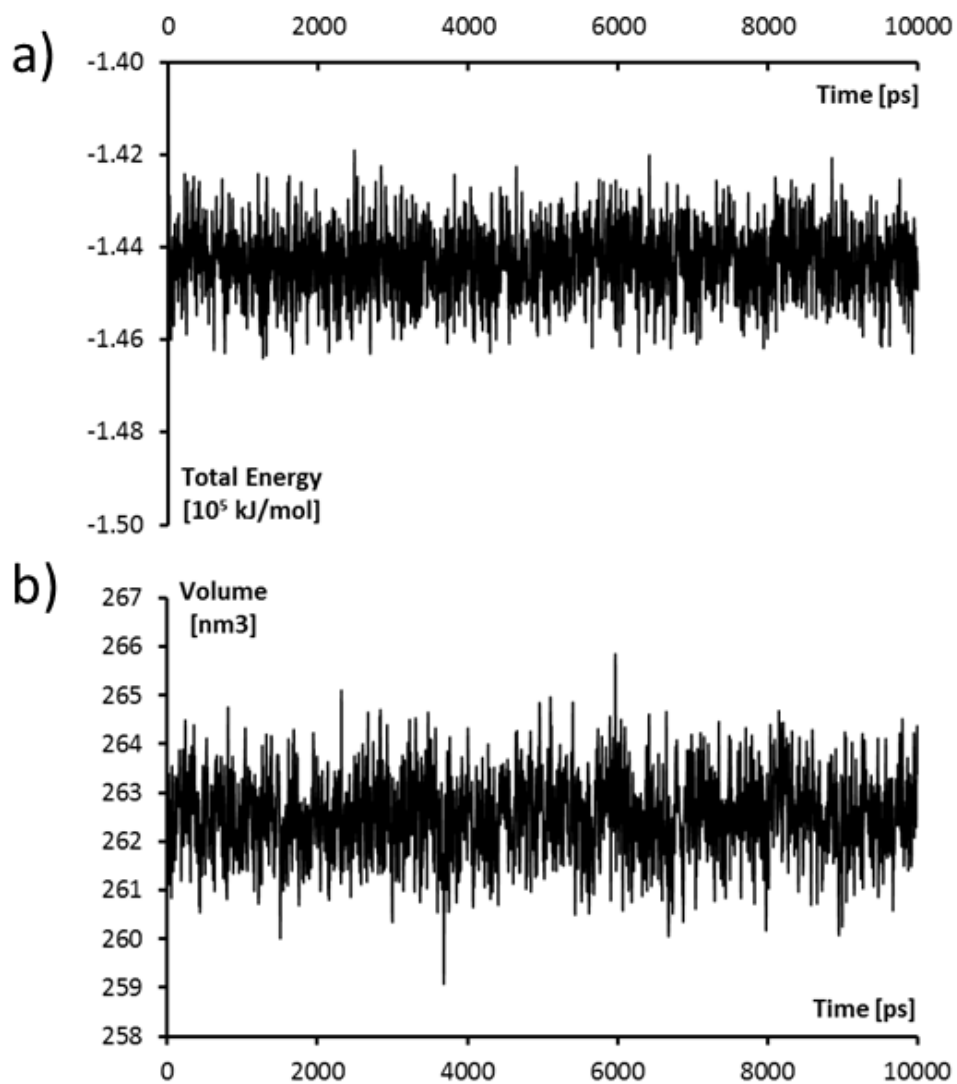

**Figure S7:** A representative plot of the total energy (a) and volume (b) as a function of simulation time. This was recorded during an MD run, which was used to derive free energy changes that were induced by pulling ammonia through the membrane.
